# Supplementary material
Source: PubMed Central journal article supplement (PMC3207238)

**Supplemental Fig I Myocardin antibody (M-16, Santa Cruz) recognizes the overexpressed and endogenous myocardin proteins in SMCs**

*A:* Protein lysates (50  $\mu$ g) from adult rat skeletal muscle (SkM, serving as negative control) and Dox-treated myocardin T-REx SMCs were subjected to western blotting analysis with myocardin M-16 antibody with or without pre-incubation of blocking peptide (sc-21561 p, Santa Cruz). Note that the presence of blocking peptide completely blocked the blot signals of M-16 antibody. *B:* Human aortic SMCs were transfected with 50 nM ON-TARGETplus SMARTpool myocardin siRNA (siMyocd, lane 3) or non-targeting siRNA (siControl, lane 2) (Dharmacon, Lafayette, CO) with TransIT-TKO (Mirus Bio, Madison, WI). 48 h after transfection, proteins were extracted. 50  $\mu$ g proteins were subjected to western blotting analysis for endogenous myocardin (lane 2 & 3) with myocardin (M-16) antibody. To ensure the position of endogenous myocardin, 8  $\mu$ g protein lysate from Dox-treated myocardin T-REx SMCs was run in parallel (lane 1, overexpressed).  $\beta$ -actin was detected as a loading control.

**Supplemental Fig II Northern blots for miR-1 induction upon myocardin overexpression in SMCs**

Total RNAs from adult rat skeletal muscle (SkM, serving as positive control, 5  $\mu$ g) and empty vector (EV) or myocardin T-REx SMCs treated with or without Dox for 3 d SMCs (40  $\mu$ g) were subjected northern blotting analysis. Mature and precursor of miR-1 was indicated. U6 serves as a loading control.

Supplemental Fig I

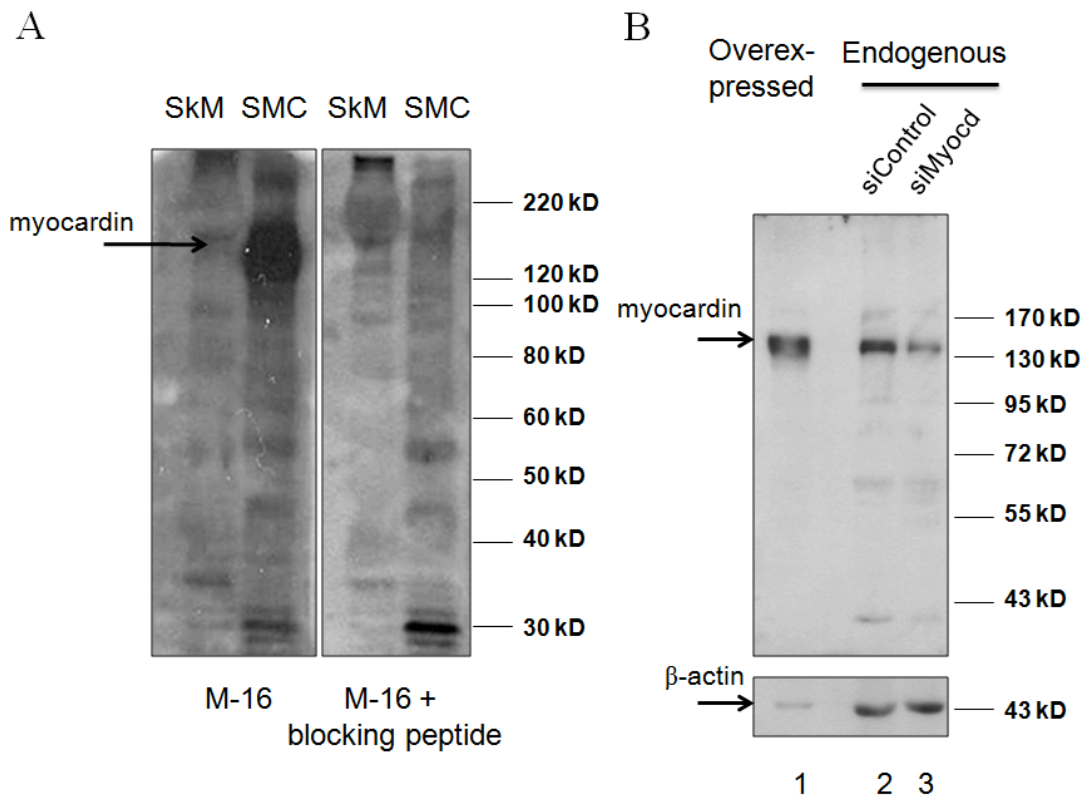

Supplemental Fig II

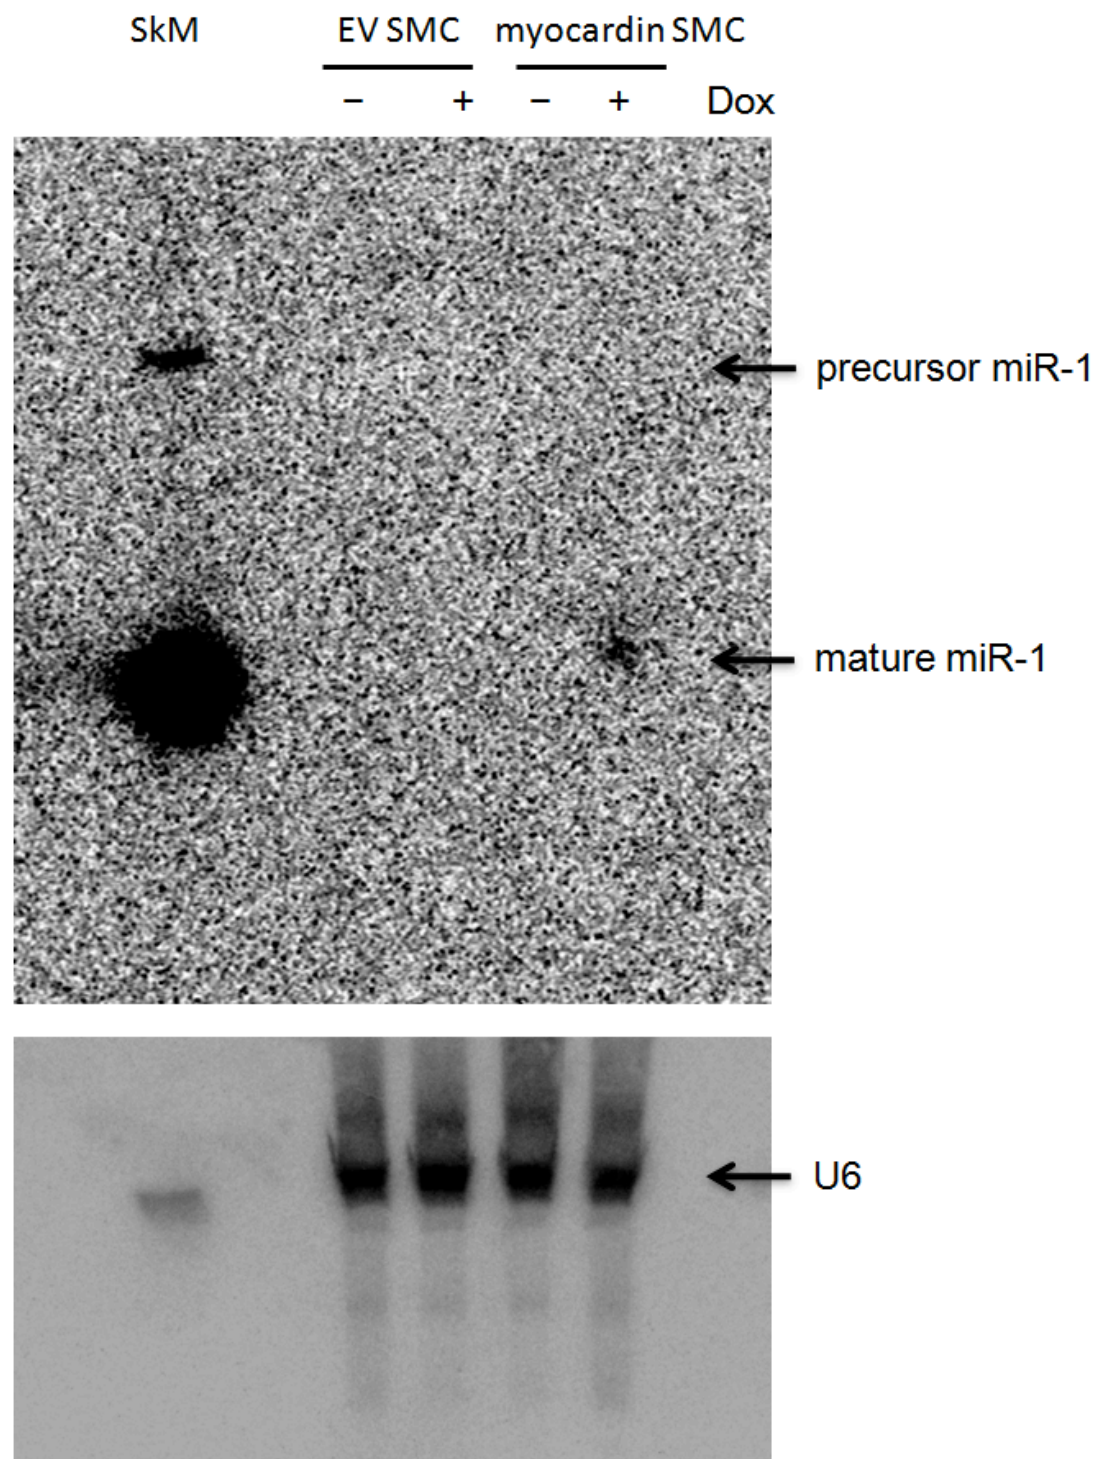

Supplement: NIHMS252872-supplement-Supp1.pdf [file NIHMS252872-supplement-Supp1.pdf]
